# Supplementary material for: General route to graphene with liquid-like behavior by non-covalent modification
Source: Royal Society of Chemistry journal article supplement (doi:10.1039/c2sm26307f), 2012-01-01
Supplement: c2sm26307f.pdf [file c2sm26307f.pdf]

Electronic Supporting Information

## General avenue to graphene with liquid behavior by non-covalent modification

Zhenghai Tang,<sup>a</sup> Liqun Zhang,<sup>\*b</sup> Chunfang Zeng,<sup>a</sup> Tengfei Lin<sup>a</sup> and Baochun Guo<sup>\*a</sup>

<sup>a</sup> Department of Polymer Materials and Engineering, South China University of Technology, Guangzhou 510640, China. E-mail: pbscguo@scut.edu.cn; Fax: +86 20 22236688; Tel: +86 20 87113374

<sup>b</sup> Key Laboratory of Beijing City for Preparation and Processing of Novel Polymer Materials, Beijing University of Chemical Technology, Beijing, 100029, P, R, China. E-mail: zhanglq@mail.buct.edu.cn

### Supporting figure and discussion

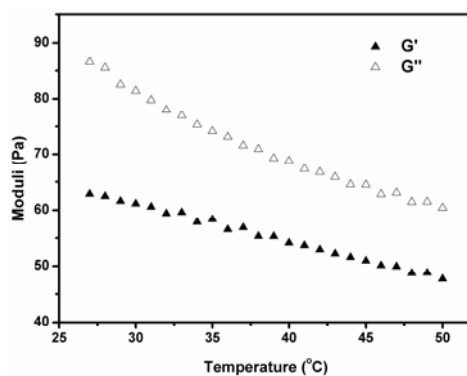

Fig. S1 Moduli as a function of temperature

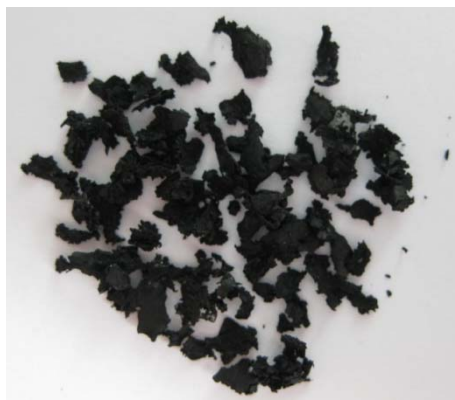

Fig. S2 Photo of the control sample

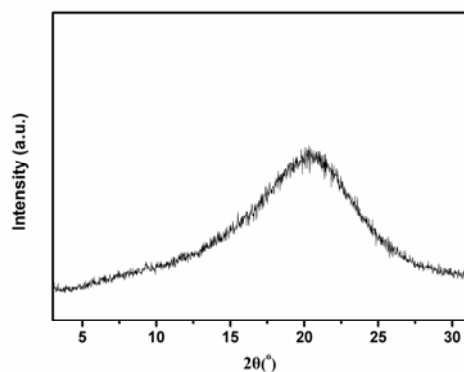

Fig. S3 XRD pattern of the neat M2070

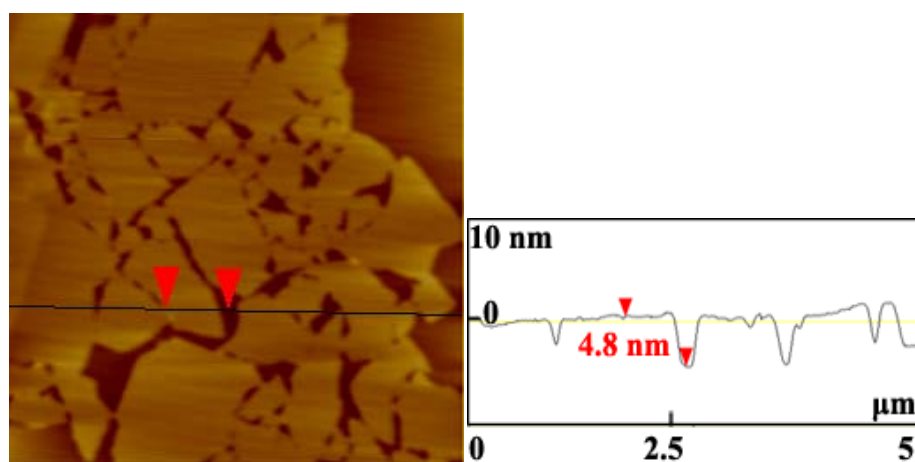

Fig. S4 AFM image of G-NIM and its height profile. The sample was prepared by dropping G-NIM/water dispersion onto mica and then drying.

The control sample cannot be dispersed in the solvents which can suspend G-NIM. As shown in Fig. S5, precipitation is instantly observed after sonication of the control samples in the solvents and then settling for 0.5 hour.

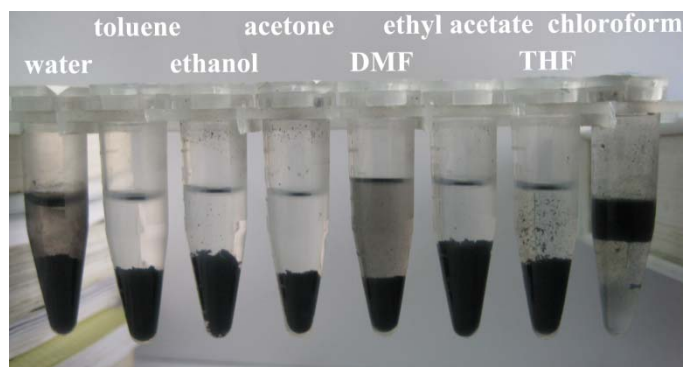

Fig. S5 Photo of the control sample in the solvents
